# Supplementary material for: Evolutionary Pattern Comparisons of the SARS-CoV-2 Delta Variant in Countries/Regions with High and Low Vaccine Coverage
Source: MDPI journal article supplement (doi:10.3390/v14102296), 2022-10-19
Supplement: s1 [file s1]

**Table S1. Docking scores for the RBD and hACE2 complexes.**

|                         | <b>Delta wild type</b> | <b>501Y mutant</b> | <b>452L-484E mutant</b> |
|-------------------------|------------------------|--------------------|-------------------------|
| Docking score (cal/mol) | -276.54                | -341.94            | -302.95                 |
| Ligand RMSD(Å)          | 0.69                   | 0.48               | 1.45                    |

RMSD, root-mean-square deviation; RBD, receptor-binding domain; hACE2, human angiotensin-converting enzyme 2.
